# Supplementary material for: Quantitative differences between intra-host HCV populations from persons with recently established and persistent infections
Source: PubMed Central journal article supplement — Virus Evol. 2020 Dec 30;7(1):veaa103. doi: 10.1093/ve/veaa103 (PMC7816669; doi:10.1093/ve/veaa103), 2020-12-30
Supplement: veaa103_supplementary_data.pdf [file veaa103_supplementary_data.pdf]

| Features                 | p-value  | Persistent mean | Recent mean | Description                                                                                                                                    | Dynamics in time | Interpretation                                                                        |
|--------------------------|----------|-----------------|-------------|------------------------------------------------------------------------------------------------------------------------------------------------|------------------|---------------------------------------------------------------------------------------|
| 1. Mean distance         | 1.41E-24 | 0.034           | 0.015       | Average number of point mutations between pairs of haplotypes. Measures diversity                                                              | ↑                | Accumulation of mutations and diversification over the course of intra-host evolution |
| 2. Std distance          | 4.10E-14 | 0.019           | 0.010       | Standard deviation of number of point mutations between pairs of haplotypes. Measures diversity.                                               | ↑                |                                                                                       |
| 3. Conservation score    | 5.11E-25 | 0.422           | 0.188       | Average distance between the observed nucleotides and their consensuses. The distance is based on the NUC44 scoring matrix. Measures diversity | ↑                |                                                                                       |
| 4. Mutation frequency    | 3.07E-16 | 0.023           | 0.010       | Average number of point mutations between haplotypes and the most frequent haplotype. Measures diversity.                                      | ↑                |                                                                                       |
| 5. k-entropy $E_k(k=10)$ | 7.00E-23 | 0.630           | 0.357       | Average entropy of $k$ -mers                                                                                                                   | ↑                |                                                                                       |

|                            |          |        |        |                                                                                                                                      |   |                                                                                                                |
|----------------------------|----------|--------|--------|--------------------------------------------------------------------------------------------------------------------------------------|---|----------------------------------------------------------------------------------------------------------------|
|                            |          |        |        | (subsequences of length k) starting at fixed genomic positions. Measures diversity.                                                  |   |                                                                                                                |
| 6. Frequency entropy $E_L$ | 4.56E-06 | 0.668  | 0.567  | Entropy of observed haplotype frequencies. Measures diversity.                                                                       | ↑ |                                                                                                                |
| 7. SNV entropy $E_1$       | 1.14E-21 | 0.084  | 0.043  | Average entropy of SNV frequencies. Measures diversity.                                                                              | ↑ |                                                                                                                |
| 8. Transversion mutation   | 1.06E-07 | 0.061  | 0.032  | Frequency of mutations between purine and pyrimidine nucleotides.                                                                    | ↑ | The role of genetic saturation                                                                                 |
| 9. DN/DS                   | 5.39E-10 | 0.713  | 1.330  | Ratio of non-synonymous (DN) and synonymous (DS) substitutions. Measures the strength of selection                                   | ↓ | Increase in purifying selection indicating a growing role of intra-host adaptation                             |
| 10. PCA complexity         | 1.4E-03  | 0.0053 | 0.0125 | Percentage of principal components required to explain at least $\alpha=50\%$ percent of the observed genetic variance. Measures the | ↓ | Increase of structuredness of intra-host viral populations, possibly associated with intra-host adaptation and |

|                                  |          |       |       |                                                                                                                                                                                                        |   |                                                                                                                                      |
|----------------------------------|----------|-------|-------|--------------------------------------------------------------------------------------------------------------------------------------------------------------------------------------------------------|---|--------------------------------------------------------------------------------------------------------------------------------------|
|                                  |          |       |       | population complexity.                                                                                                                                                                                 |   | emergence of specialization                                                                                                          |
| 11. Kolmogorov complexity        | 1.55E-11 | 0.041 | 0.052 | The highest possible degree of compression of observed viral sequences without loss of information. Measures the population complexity.                                                                | ↓ |                                                                                                                                      |
| 12. Robustness/Selection balance | 3.66E-15 | 0.628 | 0.386 | Correlation between haplotype frequencies and haplotype centralities in the observed genetic network. Measures the balance between mutational robustness and selection.                                | ↑ |                                                                                                                                      |
| 13. s-metric                     | 1.93E-20 | 0.001 | 0.044 | Network theory feature that measures how close a genetic network is to being scale-free (a type of networks characterized by the presence of hubs, small diameter and a power-law degree distribution) | ↓ | The major role of multiple founders at the earlier infection stage, later superseded by the increased role of mutational robustness. |

|                                  |          |        |       |                                                                                                                                         |     |                                                                                                                                                                                                                                                 |
|----------------------------------|----------|--------|-------|-----------------------------------------------------------------------------------------------------------------------------------------|-----|-------------------------------------------------------------------------------------------------------------------------------------------------------------------------------------------------------------------------------------------------|
| 14.<br>Clustering<br>coefficient | 2·08E-13 | 0·082  | 0·356 | Network theory<br>feature that<br>measures the<br>propensity of<br>haplotypes to<br>cluster together<br>in the genetic<br>network       | ↓   |                                                                                                                                                                                                                                                 |
| 15. ODE<br>feature<br>$C_{ODE}$  | 2·42E-06 | -0·270 | 0·224 | The estimation<br>of a population<br>age using a<br>dynamic model<br>of viral evolution<br>under the<br>immune<br>system's<br>pressure. | N/A | Declining role of<br>immune escape                                                                                                                                                                                                              |
| 16.<br>Biochemical<br>feature    | 2·92E-35 | 0·628  | 0·379 | Total frequency<br>of haplotypes<br>identified as<br>having a physico-<br>chemical profile<br>pointing to<br>persistent<br>infection.   | ↑   | The change of<br>physico-<br>chemical<br>properties is<br>likely to be<br>associated with<br>transition<br>between<br>evolutionary<br>mechanisms<br>responsible for<br>virus survival<br>and proliferation<br>at different<br>infection stages. |

**Table S1:** Descriptions and statistical results for analyzed features.
